# Supplementary material
Source: PubMed Central journal article supplement (PMC7745397)
Supplement: ao0c05146_si_002.pdf [file ao0c05146_si_002.pdf]

# **A Highly Efficient, Environmentally Friendly Lignin-based Flame Retardant Used in Epoxy Resin**

Peng Dai<sup>‡1</sup>, Mengke Liang<sup>‡1</sup>, Xiaofeng Ma<sup>1,2</sup>, Yanlong Luo<sup>1,2</sup>, Ming He<sup>1,2</sup>, Xiaoli Gu<sup>3</sup>, Qun Gu<sup>4</sup>,  
Imtiaz Hussain<sup>1</sup>, Zhenyang Luo <sup>\*1,2</sup>

*1. College of Science, Nanjing Forestry University, 159 Longpan Road, Nanjing 210037, P. R. China*

*2. Institute of Polymer Materials, Nanjing Forestry University, 159 Longpan Road, Nanjing 210037, P. R. China*

*3. College of Chemical Engineering, Nanjing Forestry University, 159 Longpan Road, Nanjing 210037, P. R. China*

*4. Department of Chemistry, Edinboro University of Pennsylvania, 230 Scotland Rd, Edinboro 16444, United States*

*\*Corresponding author. E-mail address: [luozhenyang@njfu.edu.cn](mailto:luozhenyang@njfu.edu.cn) (Z. Luo)*

*‡ P. Dai, and M. Liang equally contributed to this paper.*

## 1. Preparation of PA-DOPO

Firstly, piperazine, carbon tetrachloride, triethylamine, and methylene dichloride were mixed in a three-neck flask (solution 1). Secondly, DOPO was dissolved in methylene dichloride and the solution was transferred to a dropping funnel, from which the mixture was added dropwise into solution 1 (with constant stirring) under N<sub>2</sub> atmosphere at 0°C. Then, the reaction mixture was left for 10 hours at room temperature. The molar ratio of DOPO, triethylamine, carbon tetrachloride, and piperazine is 1:1.1:1.1:10. Piperazine is overwhelmingly excessive to ensure minimal by-product. After completion of the reaction, the mixture was filtered and the solid product was washed 3 times with DI water to obtain purified PA-DOPO (yield: 20.5 %).

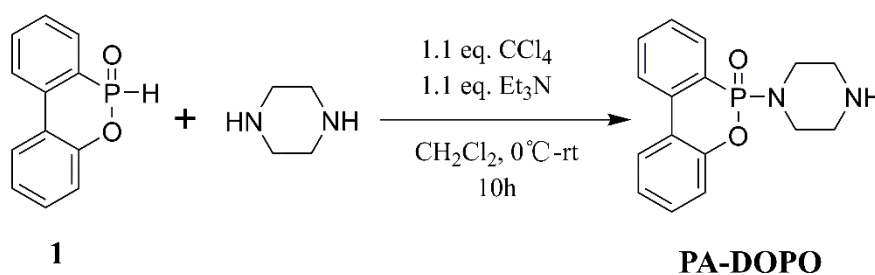

## Scheme S1. Synthetic route of the intermediate (PA-DOPO)

### 2. Preparation of Lig-P

First, the lignin is purified according to the method described in the literature<sup>1</sup> to obtain an originally purified lignin, Lig-O. Then, Lig-O is subjected to phenolation process according to the method of Jacob Podschun<sup>2</sup> to obtain Lig-P (yield: 80.5 %).

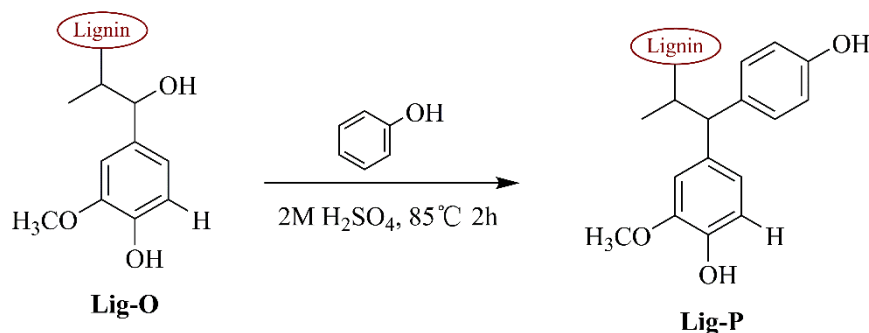

Scheme S2. Synthetic route of the Lig-P

### 3. Characterization of PA-DOPO

<sup>1</sup>H NMR (CDCl<sub>3</sub>, 300K, Bruker Biospin 600 MHz)  $\delta$  (ppm): 8.02-8.00 (t, 1H, J = 6.1 Hz), 7.95-7.94 (d, 1H, J = 7.8 Hz), 7.83-7.79 (q, 1H, J = 7.2 Hz), 7.70-7.67 (t, 1H, J = 7.8 Hz), 7.51-7.48 (m, 1H), 7.48-7.36 (t, 1H, J = 34.5 Hz), 7.35-7.22 (m, 2H), 3.43-3.41 (m, 4H), 3.18 (s, 4H). NMR data confirmed successful grafting of PA to DOPO.

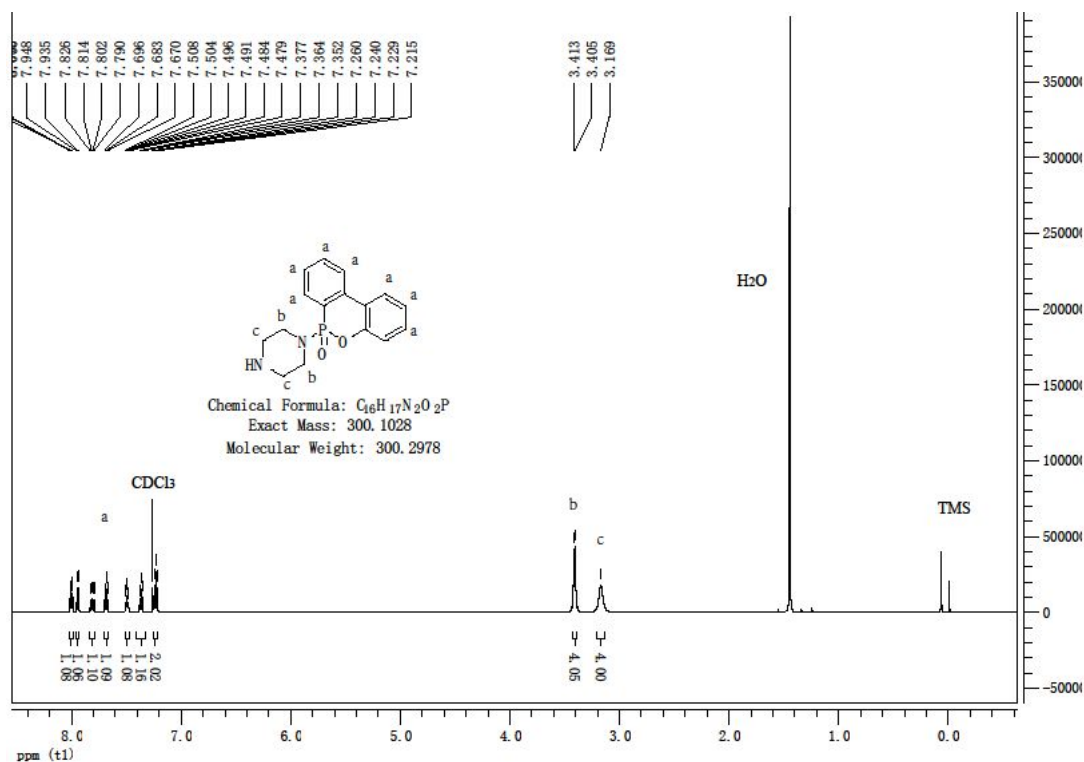

**Figure S1.  $^1H$  NMR of PA-DOPO**

## **4 Characterization of pretreated lignin (Lig-P)**

### **4.1 Qualitative analysis of phenolated lignin**

Two-dimensional NMR (DMSO- $d_6$ , 300 K, Bruker Biospin 600 MHz) is used to characterize changes in chemical structure from purified lignin (Lig-O) to pretreated lignin (Lig-P). Conditions for the (Heteronuclear Single Quantum Coherence) HSQC analysis were as follows: 1.5 s pulse delay (d1), and acquisition of 160 times.

The HSQC spectrum in Figure S2 (A) shows three regions of Lig-O associated with aliphatic, oxyaliphatic and aromatic  $^{13}C$ - $^1H$  of Lig-P. For

Lig-P, a signal for phenol at  $\delta_C/\delta_H$  21.9/2.43 ppm is shown in the aliphatic region. The enhancement of the lignin phenol signal after pretreating is evident. In the oxygen-containing aliphatic region, both Lig-O and Lig-P show a cross-signal with methoxyl ( $\delta_C/\delta_H$  56.0/3.70 ppm) and side chains in the  $\beta$ -O-4' structure. In the aromatic signal region, both lignins display benzene ring signals in guaiac units ( $\delta_C/\delta_H$  115.4/6.72 ppm), which corroborates the reaction unit of lignin in Scheme S 2, while the signal region in FigureS2 (B) ( $\delta_C/\delta_H$  106.7/7.36 ppm) is attributed to the phenol. This also proves that phenol was successfully grafted onto lignin<sup>3</sup>.

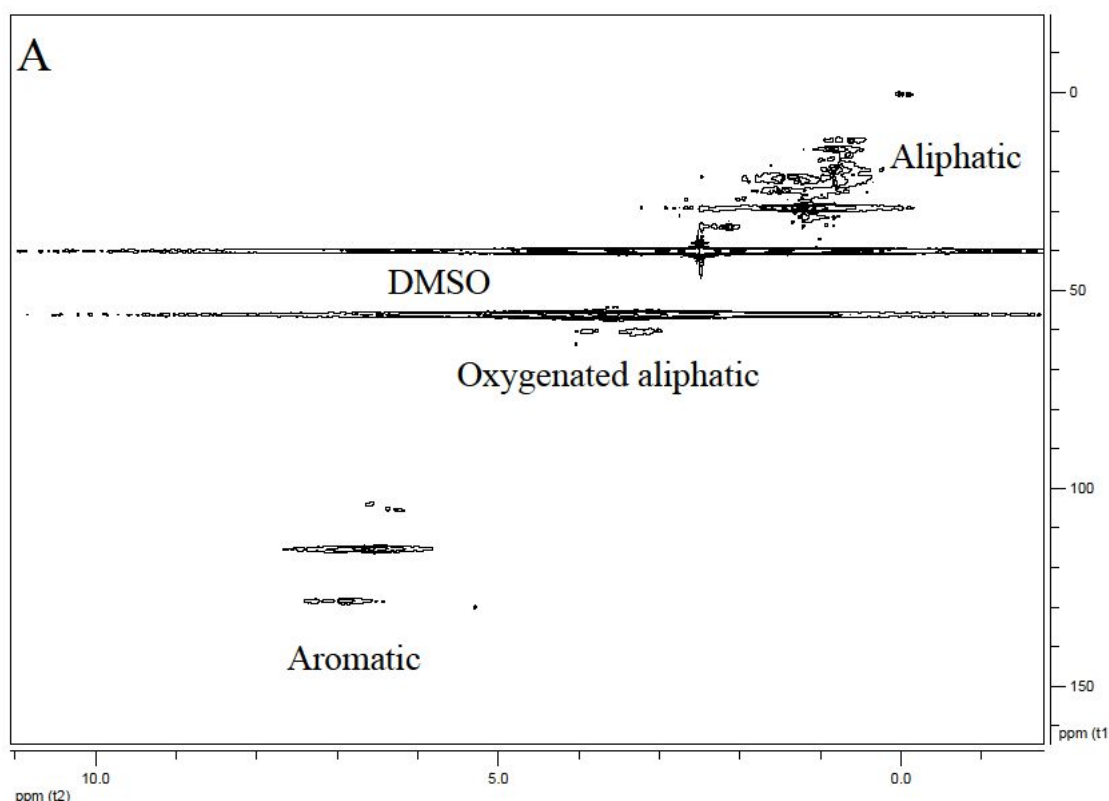

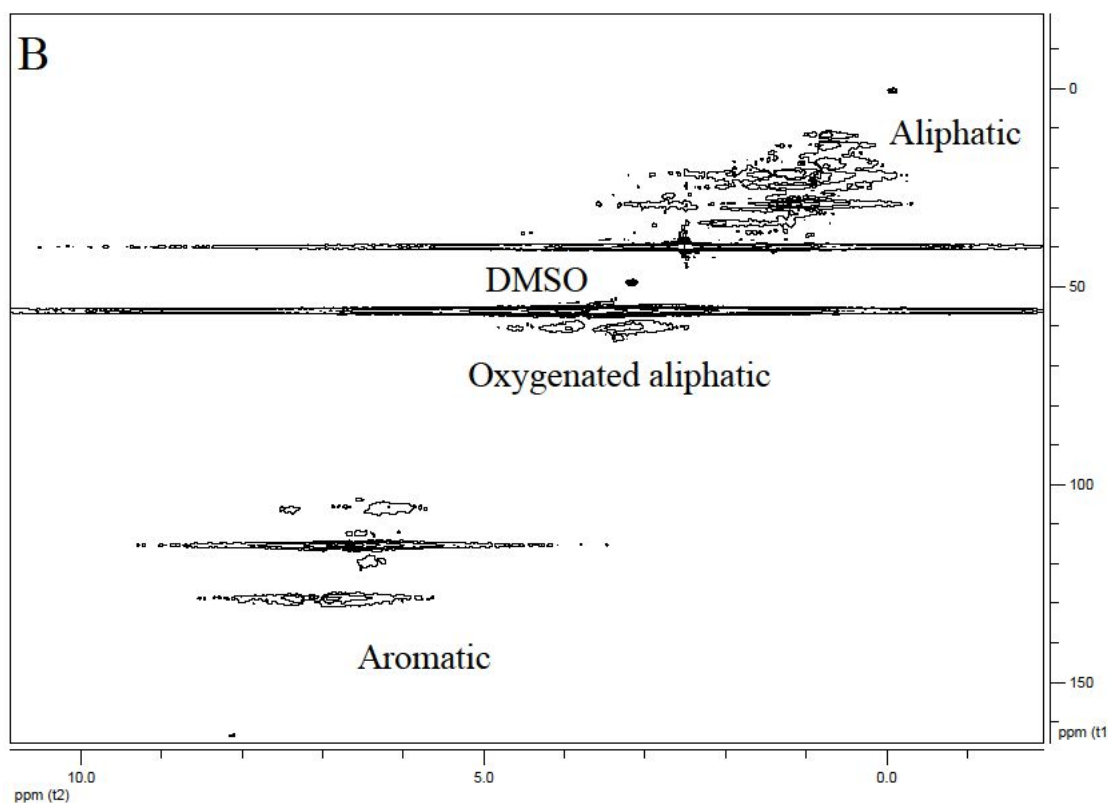

**Figure S2. Total HSQC 2D NMR spectra of (A) Lig-O, and (B) Lig-P**

#### **4.2 Quantitative analysis of phenolated lignin**

Non-aqueous phase potentiometric titration was used to determine the extent of phenolic hydroxyl in lignin samples by using the method of Pobiner<sup>4</sup>. The phenolic hydroxyl content of lignin increased from 2.8 mmol/g to 4.5 mmol/g after the phenolation, which helped the subsequent Mannich reaction to graft more PA-DOPO onto Lig-P. This process also facilitates the grafting of more DOPO onto Lig-M through nucleophilic reactions, to modulate the P content in the lignin, which enhances the flame-retardant efficiency.

## 5 Effective Heat of Combustion

Figure S3 shows the effective heat of combustion (EHC) of epoxy resin and Lig/EP composite, and the average effective heat of combustion (AEHC) data are shown in Table S1. AEHC of shows a decreasing trend from Lig-P to Lig-M to Lig-F. The Lig-F/EP shows a significant decrease of AEHC comparing to EP.

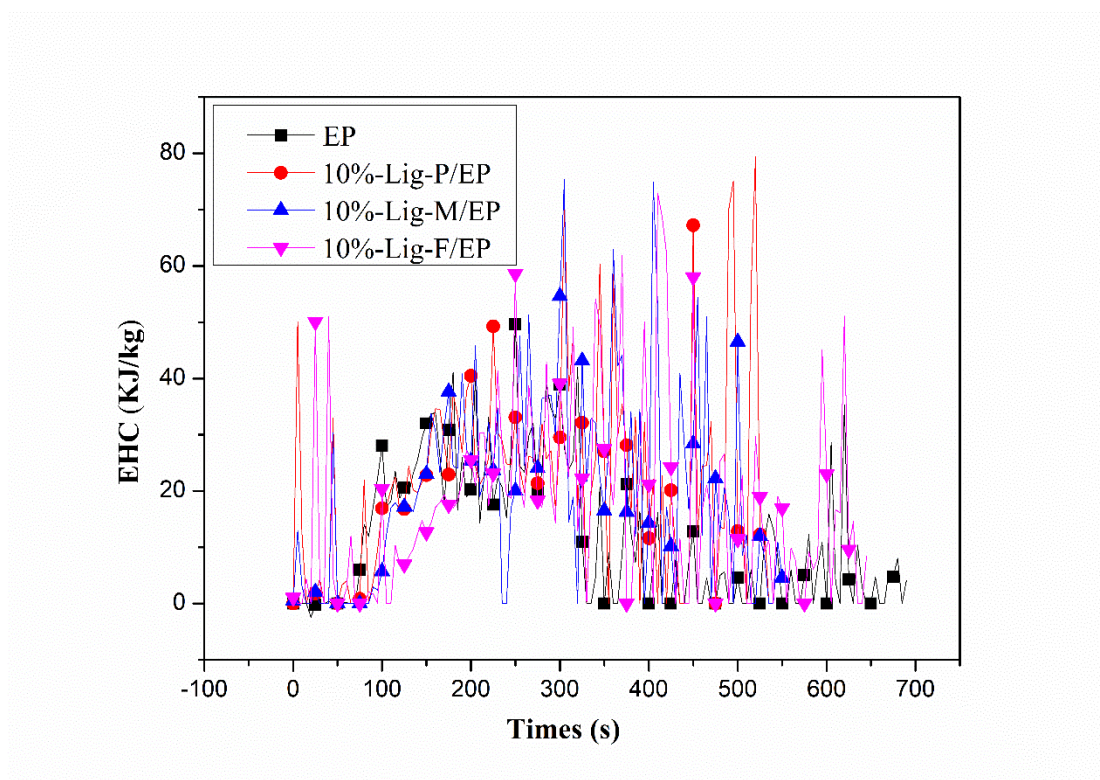

**Figure S3. Effective heat of combustion: EP, composites of 10%-Lig-P/EP, 10%-Lig-M/EP, and 10%-Lig-F/EP (dimension of each sample:  $100 \times 100 \times 3$  mm; heat flux of  $35 \text{ kW/m}^2$ )**

**Table S1 Average effective heat of combustion of EP & Lig/EP Composites**

| Samples      | AEHC (kJ/kg) |
|--------------|--------------|
| EP           | 22.4         |
| 10%-Lig-P/EP | 24.3         |
| 10%-Lig-M/EP | 23.2         |
| 10%-Lig-F/EP | 20.7         |

## 6 Analysis of Mechanical Properties of Lig-F

As shown in Figure S4, with increasing wt% of Lig-F in the composites, the tensile strength and elongation of epoxy resin composite presented a downward trend.

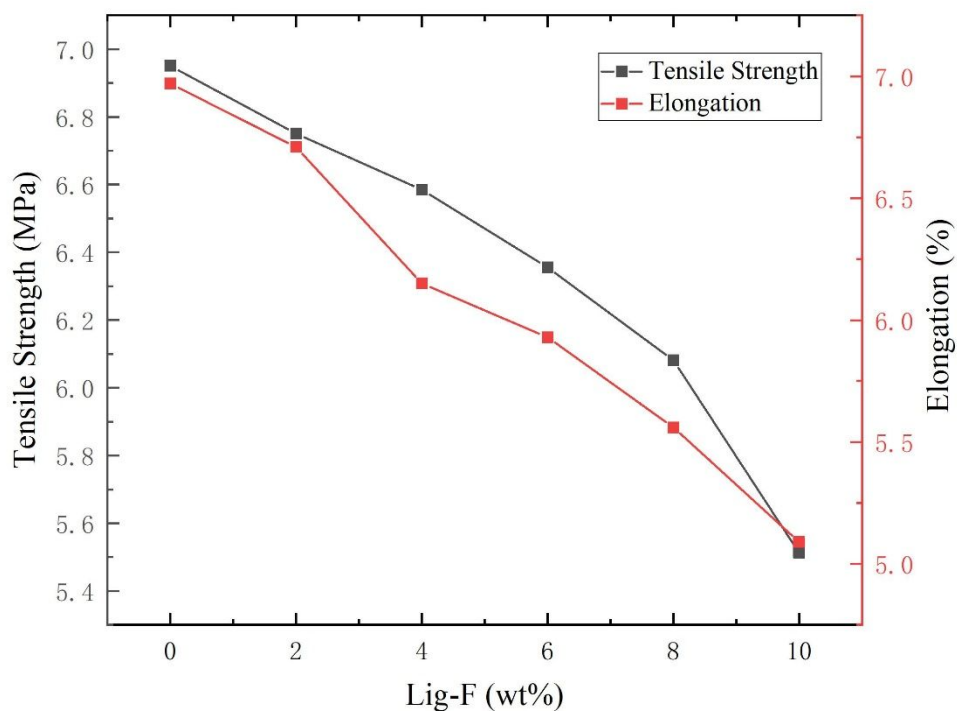



**Figure S4. Tensile strength and elongation of EP composites with different Lig-F (wt%)**

**Reference**

1. Liu, L.; Qian, M.; Song, P. A.; Huang, G.; Yu, Y.; Fu, S., Fabrication of Green Lignin-based Flame Retardants for Enhancing the Thermal and Fire Retardancy Properties of Polypropylene/Wood Composites. *ACS Sustainable Chemistry & Engineering* **2016**, 4, (4), 2422-2431.
2. Podschun, J.; Saake, B.; Lehnen, R., Reactivity enhancement of organosolv lignin by phenolation for improved bio-based thermosets. *European Polymer Journal* **2015**, 67, 1-11.
3. Ibarra, D.; Isabel Chavez, M.; Rencoret, J.; Del Rio, J. C.; Gutierrez, A.; Romero, J.; Camarero, S.; Martinez, M. J.; Jimenez-Barbero, J.; Martinez, A. T., Lignin modification during Eucalyptus globulus kraft pulping followed by totally chlorine-free bleaching: A two-dimensional nuclear magnetic resonance, fourier transform infrared, and pyrolysis-gas chromatography/mass spectrometry study. *Journal of Agricultural and Food Chemistry* **2007**, 55, (9), 3477-3490.

4. Harvey, P., Improved inflection points in the non-aqueous potentiometric titration of acid functionalities in lignin chemicals by using internal standardization and ion exchange. *Analytica Chimica Acta* **1983**, 155, 57-65.
